# Supplementary material for: Structural Characterization of Rat Galectin-5, an N-Tailed Monomeric Proto-Type-like Galectin
Source: MDPI journal article supplement (doi:10.3390/biom11121854), 2021-12-09

**Figure S1:** Sedimentation velocity experiment of rGal5 in the absence (triangles) and in the presence (circles) of lactose.

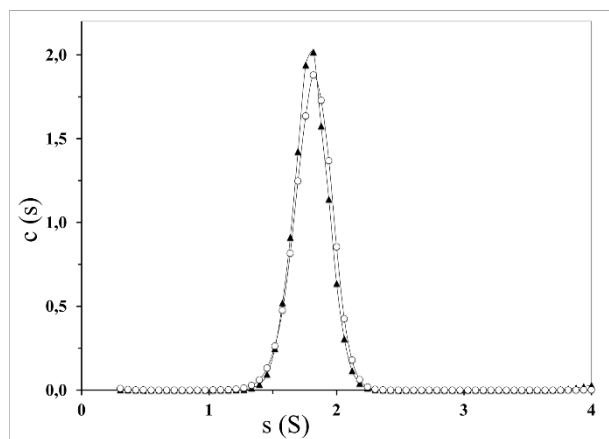

**Figure S2:** Binding of lactose, LacNAc and blood histo-group B (type 2) tetrasaccharide to rGal5 studied by Isothermal Titration Calorimetry.

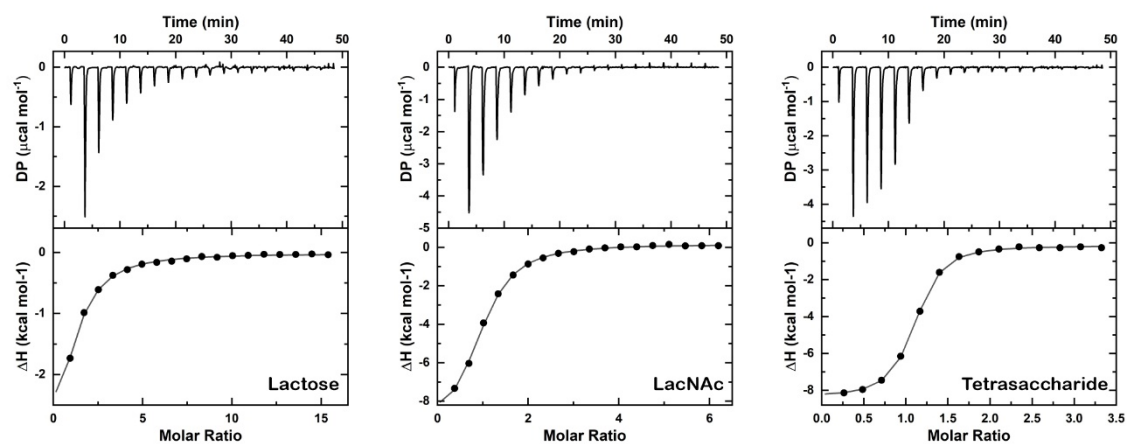

Supplement: s1 [file s1]
